# Supplementary material for: PIGR predicts good clinical outcomes and plays a tumor suppressor role in the development of breast cancer via enhancing tumor immunity
Source: Research Square preprint supplement (doi:10.21203/rs.3.rs-3581901/v1), 2023-11-14
Supplement: Supplementary file 1 [file c9bbf832897a2678ad8f028d.docx]

**Figure legends：**

**Supplementary Figure 1** Nomogram and calibration curves to predict BRCA patients’ 1-, 3-, and 5-year OS probability. **A** Nomogram for predicting BRCA patients’ probability of 1-, 3-, and 5-year OS. **B** Calibration curves of the nomogram prediction of 1- year OS of BRCA patients.

**C** Calibration curves of the nomogram prediction of 3- year OS of BRCA patients.

**D** Calibration curves of the nomogram prediction of 5- year OS of BRCA patients.

**Supplementary Figure 2** DNA promoter methylation levels in the PIGR gene in BRCA. **A** Differential promoter methylation levels of PIGR in BRCA and normal breast tissues were obtained from the UALCAN. **B** The methylation levels of CpG islands in the PIGR gene in BRCA were obtained from the MethSurv.

**Supplementary Figure 3** Associations between PIGR expression and an abundance of TILs, immunomodulators, chemokines, and receptors in pan-cancer from the TISIDB database. **A** Associations between PIGR expression and an abundance of TILs. **B-D** Associations between PIGR expression and an abundance of immunomodulators [including immunoinhibitors, immunostimulators, and MHC molecules]. **E-F** Associations between PIGR expression and an abundance of chemokines and receptors.

**Supplementary Figure 4** **A-F** Top six PIGR-associated TILs in the BRCA cohort. **G-L** Top six PIGR-associated immunoinhibitors in the BRCA cohort. **M-R** Top six PIGR-associated immunostimulators in the BRCA cohort.

**Supplementary Figure 5** **A-F** Top six PIGR-associated MHC molecules in the BRCA cohort. **G-L** Top six PIGR-associated chemokines in the BRCA cohort. **M-R** Top six PIGR-associated receptors in the BRCA cohort.
